# Supplementary material for: Carbon nitride initiated photopolymerization into a luminescent elastomer hydrogel
Source: Royal Society of Chemistry journal article supplement (doi:10.1039/d1qm00446h), 2021-01-01
Supplement: d1qm00446h1.pdf [file d1qm00446h1.pdf]

## Support Information

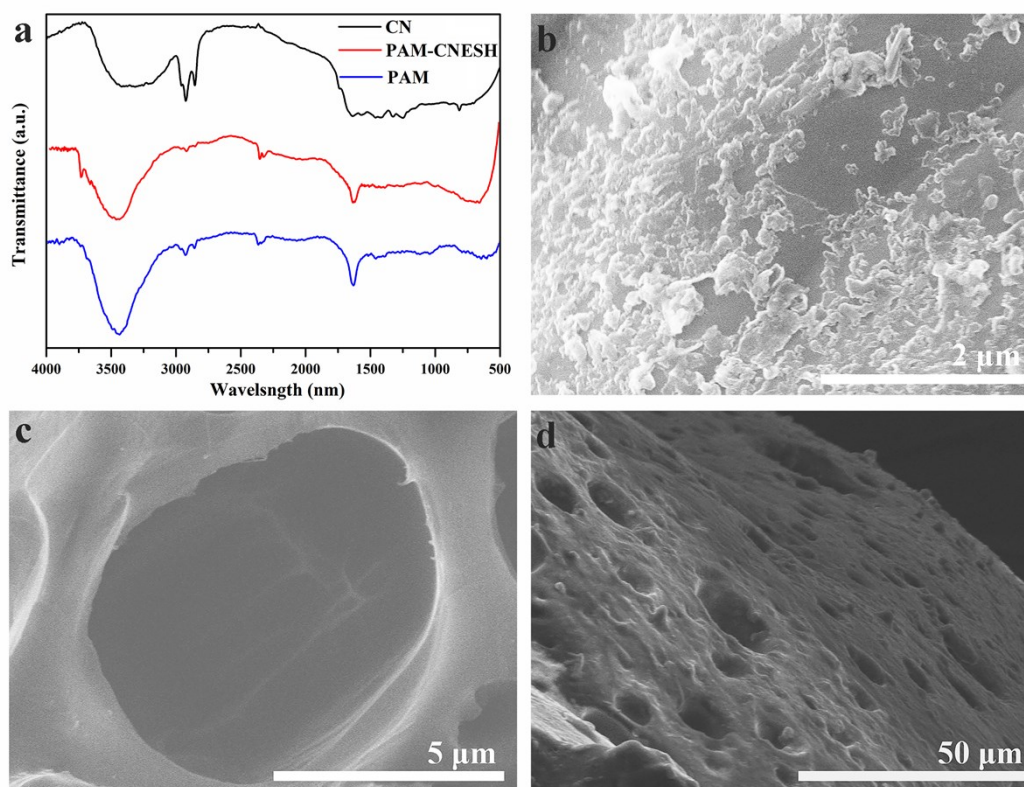

**Fig. S1.** Structure and morphology characterization for PAM-CN ESH. (a) FTIR spectra of as-prepared CN, PAM hydrogel and PAM-CN ESH. (b) SEM image for before chemical exfoliated CN. (c) SEM image for PAM-CN ESH swelling in water. (d) SEM image for PAM hydrogel.

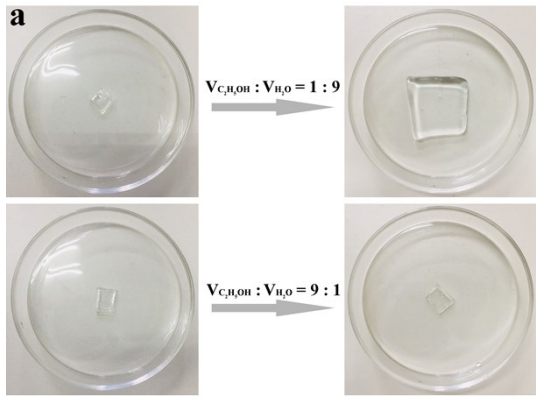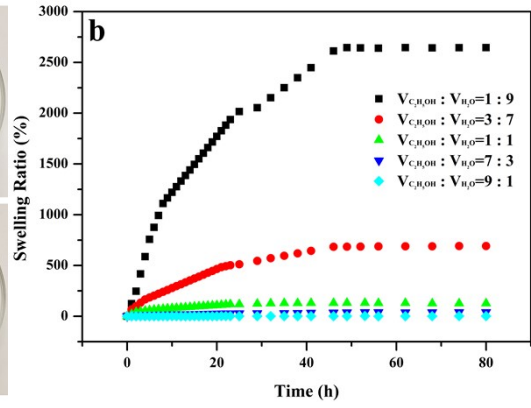

PAM-CN ESH

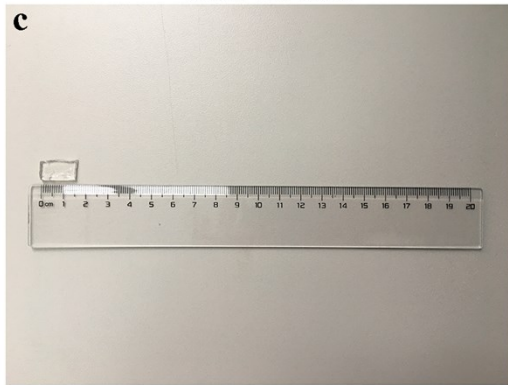

Apply force

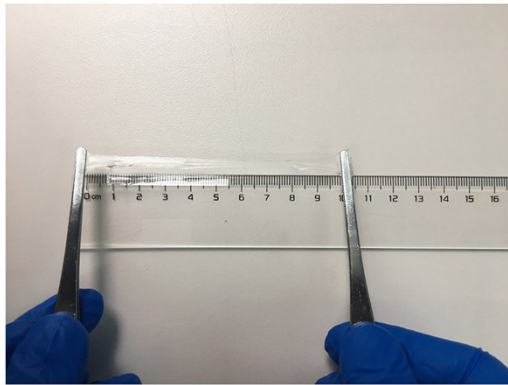

Removing force

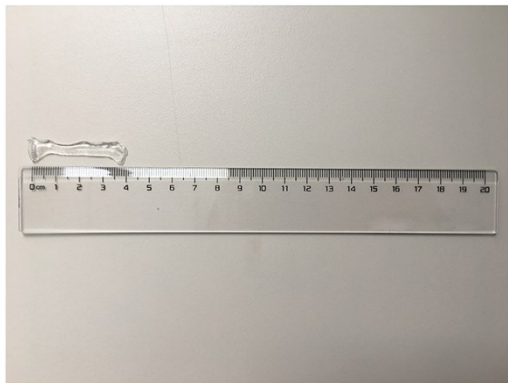

PAM-CN ESH-E

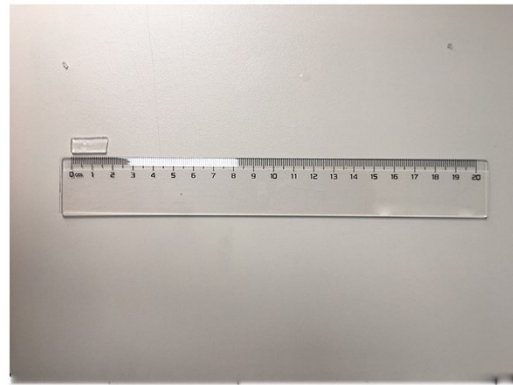

Apply force

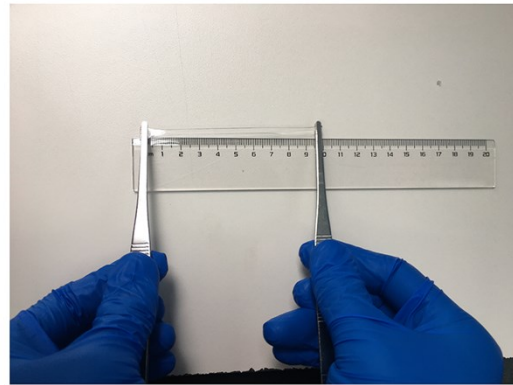

Removing force

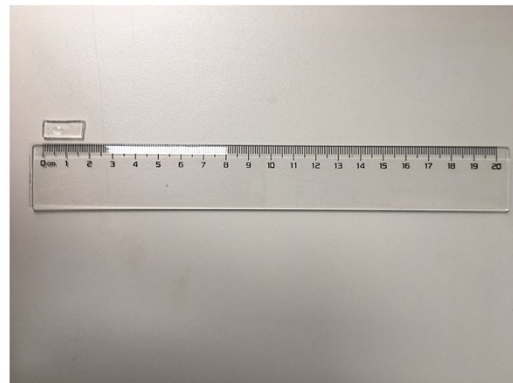

**Fig. S2.** (a) Swelling exhibition and (b) swelling ratio curve of PAM-CN ESH in different ratios of water and ethanol; (c) The photographs of the PAM-CN ESH showing excellent tensile property.

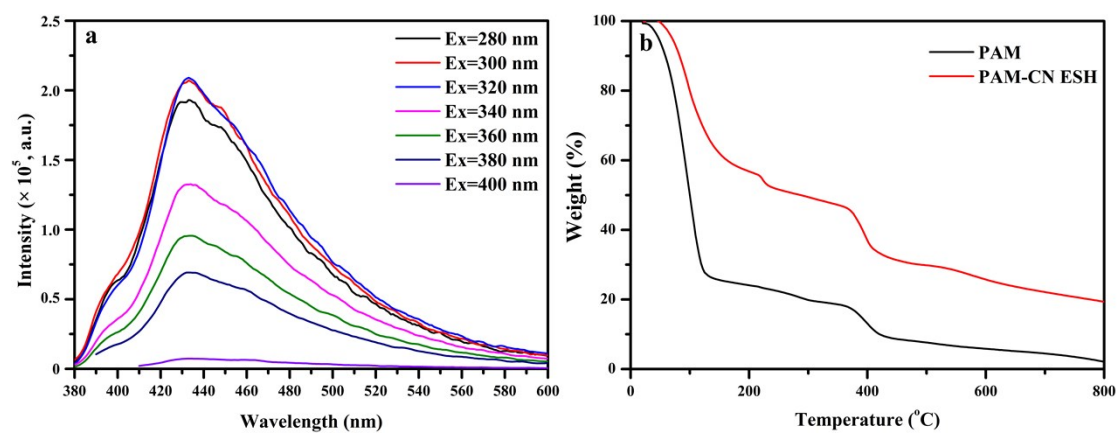

**Fig. S3.** (a) Fluorescence spectra of PAM-CN ESH at different excitation wavelengths ranging from 280 nm to 400 nm. (b) Thermogravimetric analysis curves (TGA) of PAM hydrogel and PAM-CN ESH.

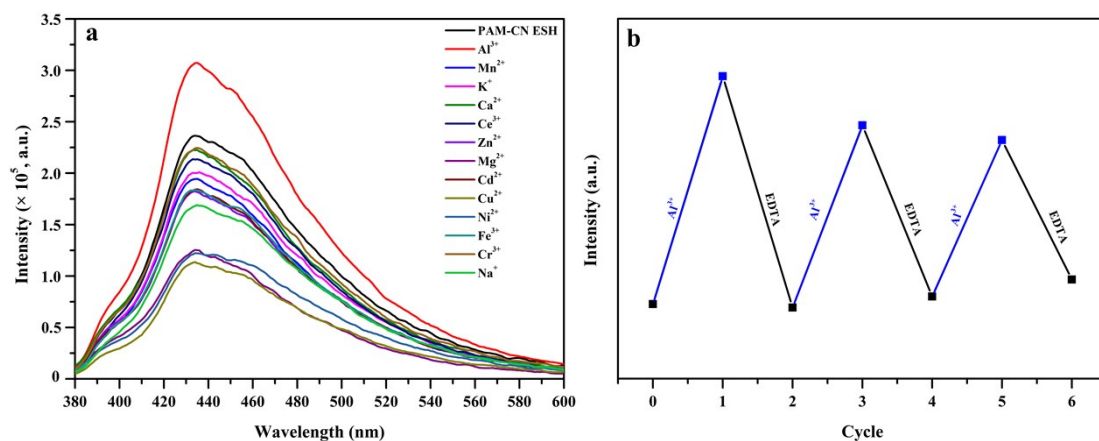

**Fig. S4.** (a) Fluorescence spectra ( $\lambda_{\text{ex}} = 320$  nm) of PAM-CN ESH in presence of different metal ions ( $\text{Al}^{3+}$ ,  $\text{Mg}^{2+}$ ,  $\text{K}^+$ ,  $\text{Ca}^{2+}$ ,  $\text{Ce}^{2+}$ ,  $\text{Zn}^{2+}$ ,  $\text{Mg}^{2+}$ ,  $\text{Cd}^{2+}$ ,  $\text{Cu}^{2+}$ ,  $\text{Ni}^{2+}$ ,  $\text{Fe}^{3+}$ ,  $\text{Cr}^{3+}$ ,  $\text{Na}^+$ ) in aqueous solutions ( $[\text{Metal ions}] = 5.00 \times 10^{-5}$  M and  $T_{\text{solu}} = 25.00 \pm 0.02$  °C.); (b) Evaluation of the reversibility of PAM-CN ESH by  $\text{Al}^{3+}$  and EDTA.
